# Supplementary material
Source: PubMed Central journal article supplement (PMC4311837)
Supplement: pnas.1418892112.sapp.pdf [file pnas.1418892112.sapp.pdf]

## 1 **Appendix S1**

### 2 **MATERIALS AND METHODS**

3 **Sample collection:** *A. coluzzii* and *A. gambiae* samples were collected from four sites in Mali:  
4 Selenkenyi (11.700°N, 8.2833°W), Kela (11.8868°N, 8.4474°W), Sidarebougou (11.4664°N, 5.7435°W),  
5 and Tissana (14.3612°N, 5.9131°W) (**Figure S1**). The distance between these sites ranged from 27 km  
6 (Selenkenyi to Kela) to 392 km (Selenkenyi to Tissana). Tissana is the driest site, with rainfall ranging  
7 from 505-694 mm/yr, followed by Kela (750-871 mm/yr), Sidarebougou (848-1106 mm/yr), and  
8 Selenkenyi (871-1240 mm/yr). *A. coluzzii* and *A. gambiae*, as well as *Anopheles arabiensis* (part of the *A.*  
9 *gambiae* sensu lato complex) are present in Selenkenyi and Kela; *A. coluzzii* and *A. gambiae* are present  
10 in Sidarebougou, and the Tissana population is mainly *A. coluzzii*, *A. arabiensis*, and extremely rare *A.*  
11 *gambiae* (**Figure S1**). Sidarebougou is located in a cotton-growing region with high agricultural  
12 insecticide use (1), while the other sites are in areas with moderate agricultural insecticide usage. These  
13 sites were chosen because we have multiple yearly collections allowing us to model selection coefficients.

14 Mosquitoes were collected during the rainy season (August-October) during the following years:  
15 Selenkenyi & Kela: 2002, 2004, 2006, 2009, 2010, 2011, 2012; Sidarebougou: 2002, 2009, 2011 and  
16 Tissana: 2006, 2011. Resting mosquitoes were collected by aspiration inside houses and stored in  
17 individual tubes in 80% ethanol.

18 **DNA extraction:** DNA from mosquito tissue was extracted using a Qiagen Biosprint (Valencia,  
19 CA) with the DNA Tissue protocol. Species identification PCRs (2, 3) were performed to distinguish *A.*  
20 *coluzzii* and *A. gambiae* from *A. arabiensis* and products were visualized on a QIAxcel instrument using a  
21 DNA Screening Kit cartridge (Qiagen, Valencia, CA).

22 **SNP genotyping:** Samples were analyzed with an iPLEX Gold multiplexed SNP genotyping  
23 array, using a Nanodispenser RS1000 and MassARRAY Analyzer Compact 96 (Sequenom, San Diego,  
24 CA) at the University of California - Davis Veterinary Genetics Lab. Samples were genotyped at five  
25 SNP loci: one in the X divergence island (28S rDNA intergenic sequence, also used to differentiate *A.*

26 *gambiae* and *A. coluzzii* (4)), one in the 2L divergence island (5), one in the 3L divergence island (5) and  
27 the L1014F SNP (TTA->TTT (6)) (**Table S1 and Figure S3**). TyperAnalyzer v. 4.0.24.71 was used to  
28 design forward and reverse primers to amplify 80-120 bp fragments surrounding the SNPs, and internal  
29 extension primers (UEP) to capture SNP genotypes (see **Table S1** for primer sequences). Amplification  
30 and extension reactions were run with 2  $\mu$ l DNA aliquots on a Sequenom MassARRAY Analyzer using  
31 manufacturer's protocol. SNP data was analyzed with TyperAnalyzer using the clustering algorithm, and  
32 manually checked for accuracy. Poorly amplified samples or poorly clustered samples were removed  
33 prior to further analysis. All karyotype and SNP data is publicly available in the PopI OpenProject  
34 AgKDR section (<https://popi.ucdavis.edu/>).

35 **Statistical tests:** Samples were classified into *A. coluzzii* and *A. gambiae* based on 28S IGS-540  
36 SNP (Favia et al. 2001). *A. coluzzii* individuals have TT genotype for 28S IGS-540 SNP, *A. gambiae*  
37 individuals have CC and hybrid individuals have CT.

38 Standard molecular indices and Hardy-Weinberg equilibrium were calculated for *A. coluzzii*  
39 populations with Arlequin 3.1 (7). L1014F SNP frequencies were calculated in all groups by site and year  
40 (due to geographic proximity and similar L1014F frequency, samples from Selenkenyi and Kela were  
41 combined). Linkage disequilibrium (LD) between the 2L island SNP and L1014F was calculated for all *A.*  
42 *coluzzii* populations using the maximum likelihood method implemented in the *EMLD* program (8).  
43 Adjusted  $r^2$  is used for further analysis. Linear regression was conducted to test the significance in decline  
44 of LD between the 2L SNP and L1014F using using Matplotlib (9).

45 **Expected genotype calculations:** Expected L1014F genotypes for F<sub>1</sub> hybrids were calculated  
46 assuming that *A. coluzzii* and *A. gambiae* hybridized at random, without regard to L1014F genotype. *A.*  
47 *coluzzii* was assumed to be 100% +/+ in our study sites in Mali (N=226 for pre-2006 +/+ abundance in *A.*  
48 *coluzzii* as shown in Table 1), while the distribution of *A. gambiae* L1014F genotypes was assumed from  
49 2006 Selenkenyi data: 33.3% +/+, 40.7% +/r, and 25.9% r/r. F<sub>1</sub> hybrids would therefore be expected to be  
50 53.7% +/+ and 46.3% +/r. L1014F frequencies for F<sub>2</sub> backcrosses were calculated using the above  
51 frequencies for F<sub>1</sub>, *A. coluzzii* and *A. gambiae* populations. We assume hybridization occurred only in

52 2006 and provided the initial influx of resistant allele ( $r$ ) and no further hybridization occurred in  
53 subsequent years based on our previous study (10). The lower bound of L1014F frequencies assume  
54 mating only occurred within *A. coluzzii* after 2006, providing resistant allele frequency of 0.045  
55 ( $=7/(77*2)$ ) from 2006 *A. coluzzii* (Table 1). The upper bound frequencies assume both F1 hybrids and *A.*  
56 *coluzzii* from 2006 contributed to gene pool in subsequent generations, providing resistant allele  
57 frequency of 0.074 ( $=14/(94*2)$ ) from 2006 *A. coluzzii* (Table 1). For post-2006, genotype frequencies  
58 within *A. coluzzii* are calculated assuming random mating in the absence of selection. Deviation from  
59 expected values was calculated by a randomization goodness-of-fit test with 10,000 replications.

60 **Selection coefficient calculation:** Temporal changes in resistant allele frequency in *A. coluzzii*  
61 and *A. gambiae* in Selenakenyi/Kela and Sidarebougou were fitted to the recursive selection equation (11)

62 
$$p_{t+1} = \frac{p_t^2(1+s) + p_t q_t(1+hs)}{1 + s(p_t^2 + 2hp_t q_t)}$$

63

64

65 using the *leastsq* option in the *scipy.optimize* package in Python (<http://scipy.org/>). *A. coluzzii* from  
66 Tissana were not fitted, due to the low number ( $n=2$ ) of time points available. To avoid  
67 overparametization for each population,  $h$  (dominance coefficient) was held constant at  $h = 0, 0.25, 0.5,$   
68  $0.75,$  and  $1.0,$  while  $p_0$  (initial resistant allele frequency) and  $s$  (selection coefficient) were fitted to the  
69 data. For estimating  $s$ , we assumed one generation per month (11), or 12 generations per year. *A. gambiae*  
70 from Selenkenyi and *A. coluzzii* from both sites showed obvious selection for resistant allele, and values  
71 for  $s$  were similar across all values of  $h$  (standard deviation = 7-28% of the mean), while *A. gambiae* from  
72 Sidarebougou had relatively constant resistant allele frequencies (83-98%) and very low values for  $s$  ( $s =$   
73  $0.014$ ), such that variation in  $h$  had a greater impact on  $s$  (standard deviation = 81% of the mean). The  
74 best fit for all populations ( $h = 0.5$ ) is reported in the results.

75 **Genome sequencing:** 33 *A. coluzzii* and *A. gambiae* from Kela/Selinkenyi were whole-genome  
76 sequenced: 12 *A. gambiae* (2012); 6 +/-, pre-2006 *A. coluzzii* (2002-2004); 8 r/+ and 5 r/r, post-2006 *A.*

77 *coluzzii* (2010-2012); and 2 post-2006 *A. coluzzii* individuals that had undergone recombination between  
78 the 2L island SNP and the L1014F locus (2012).

79 DNA concentration was quantified by a fluorescent assay for double-stranded DNA using a Qubit  
80 2.0 fluorometer (Life Technologies). DNA was cleaned and concentrated with the DNA Clean and  
81 Concentrator kit (Zymo Research Corporation). Library preparations were made with the Nextera DNA  
82 Sample Preparation Kit (Illumina), using TruSeq dual indexing barcodes (Illumina), according to the  
83 manufacturer's protocol. We used 25-50 ng of input DNA for library construction. Libraries were size-  
84 selected with Agencourt AMPure XP beads (Beckman Coulter), according to manufacturer's instructions  
85 for Illumina Hi-Seq libraries. Final library preps were quantified and checked for insert size using a  
86 QIAxcel instrument (Qiagen, Valencia, CA) and Bioanalyzer 2100 (Agilent), and concentration was  
87 measured with a Qubit 2.0 fluorometer (Life Technologies). Barcoded libraries were pooled in equimolar  
88 amounts and sequenced with Illumina's HiSeq2500 platform with paired-end 100 bp reads, at the QB3  
89 Vincent J Coates Genomics Sequencing Laboratory at UC Berkeley.

90 **Short-read Genome Sequence Mapping:** We assessed the quality of our genome sequencing  
91 reads using the FastQC software (<http://www.bioinformatics.babraham.ac.uk/projects/fastqc/>). Adaptor  
92 sequences and poor quality sequence was trimmed from the raw Illumina fastq files using the  
93 *Trimmomatic* software, version 0.30 (12), using default options. Reads were aligned to the *A. gambiae*  
94 reference genome (AgamP3 version 3.x) using *Stampy* (version 1.0.22) (13), with *BWA* used as a pre-  
95 mapper to accelerate the mapping (14). We then used *MarkDuplicates* from *Picard* tools (15) to remove  
96 PCR duplicates and used the Genome Analysis Tool Kit (*GATK*) v1.7 (16) to realign reads around indels.  
97 The resulting sorted *bam* (Binary sequence Alignment/Map) files, which contain sequences for each read  
98 and its mapping position, were then used for later analysis.

99 **SNP calling:** In order to identify sequence variants that are over-represented (frequency of 0.67  
100 or greater) in *A. coluzzii* or *A. gambiae*, we chose 3 individuals of each species and generated a multiple  
101 pileup file for those individuals using *SAMtools mpileup* (version: 0.1.19-44428cd) (17). Next, we  
102 produced a consensus sequence for *A. coluzzii* and *A. gambiae* using the two mpileup files and the

103 *mpileup2cons* program from VarScan (18). Then, we identified all differences between the final consensus  
104 sequences between species. It should be noted that many but not all of the identified SNP locations are  
105 fixed between species. Therefore, these SNPs are appropriate for comparing relative trends in “A.  
106 *gambiae*-ness” between individuals and should not be used individually to genotype *A. coluzzii* and *A.*  
107 *gambiae*. This set of SNPs was used for calculating  $F_{ST}$  and “*A. gambiae* proportions” for Figure 2.

108 Genotype frequencies for the minor-effect SNPs that have co-introgressed within the *kdr* gene,  
109 identified in whole genome sequenced samples. These minor-effect SNPs are the synonymous/intronic  
110 [C/T] SNP at 2L: 2,417,678 (20) and N1575Y [A/T] at 2L: 2,429,745 (51). The genomic locations of  
111 these SNPs are shown in Figure S4.

112 **Proportion *A. gambiae*:** We used *SAMtools mpileup* (17) to genotype each individual at the *A.*  
113 *gambiae/coluzzii* differential SNP positions identified in our SNP calling step, excluding the individuals  
114 that were already used to define the SNPs. Using data from the variant call file (*VCF*) output, we  
115 calculated the proportion of *A. gambiae* alleles (limited to biallelic sites) in 100kb bins across the genome.  
116 For example, homozygous sites were counted as *A. coluzzii* (Proportion *A. gambiae* = 0) or *A. gambiae*  
117 (=1), depending on allele, while heterozygous sites were counted as half (Proportion *A. gambiae* =0.5) *A.*  
118 *coluzzii* and half *A. gambiae*. The trends in proportion *A. gambiae* were plotted using Matplotlib (9), with  
119 Gaussian smoothing.

120  **$F_{ST}$ , and Tajima’s *D*:** *SAMtools* and *BCFtools* were used to generate *mpileup* consensus files and  
121 call variants, against the PEST reference genome. *VCFtools* (19) was used to calculate  $F_{ST}$  in 100kb  
122 windows across chromosome 2 and Tajima’s *D* in 5kb windows from 0-9 Mbp on chromosome 2L.

123 **Table S1:** SNPs used in the iPLEX Gold Assay, with genomic location, gene ID, primers, and primer  
 124 concentrations.

| SNP ID            | location                           | gene              | Primers                                                                               | Variants | multiplex concentration                    |
|-------------------|------------------------------------|-------------------|---------------------------------------------------------------------------------------|----------|--------------------------------------------|
| <b>28SIGS-540</b> | multiple locations in X centromere | rDNA IGS          | F: TTGAGTGTAGCAAGGGATCG<br>R: ACCAAGCTTCACCAGAGCAC<br>UEP: GACCAAGATGGTTCGTT          | [G/A]    | 1.0 $\mu$ M<br>1.0 $\mu$ M<br>7.0 $\mu$ M  |
| <b>04679-157</b>  | 2L:<br>209,534                     | <i>AGAP004679</i> | F: ATATCAAGGATATCACACG<br>R: TCTGTTCGTCGTACCATCAG<br>UEP:<br>AAGGATATCACACGATTCGTTAA  | [C/T]    | 1.0 $\mu$ M<br>1.0 $\mu$ M<br>9.3 $\mu$ M  |
| <b>10313-052</b>  | 3L;<br>296,897                     | <i>AGAP010313</i> | F: AAGAAGCTGTGGCGTGTTAC<br>R: TAGGCTTGGATATTGTTCCCT<br>UEP: TGGATATTGTTCCCTCGATAT     | [C/T]    | 1.0 $\mu$ M<br>1.0 $\mu$ M<br>11.6 $\mu$ M |
| <b>L1014F</b>     | 2L;<br>2,422,652                   | <i>AGAP04707</i>  | F: CTTGGCCACTGTAGTGATAG<br>R: TGTA AAAACGATCTTGGTCC<br>UEP:<br>GTTAATTTGCATTACTTACGAC | [A/T]    | 1.0 $\mu$ M<br>1.0 $\mu$ M<br>14.0 $\mu$ M |

125

126 **Table S2:** linkage disequilibrium (LD) between the 2L SNP and L1014F, within *A. coluzzii* populations.

127 EMLD was used to calculate  $D'$ ,  $r^2$  and p-values using Fisher's exact test.

| year        | site         | N  | $D'$   | $r^2$       | p-value    |
|-------------|--------------|----|--------|-------------|------------|
| <b>2006</b> | Tissana      | 40 |        | Monomorphic |            |
| <b>2006</b> | Kela         | 27 | 1      | 0.4909      | 0.03108911 |
| <b>2006</b> | Selenkenyi   | 49 | 0.6279 | 0.226       | <0.00001   |
| <b>2009</b> | Sidarebougou | 47 | 1      | 0.9583      | <0.00001   |
| <b>2009</b> | Kela         | 72 | 0.903  | 0.8155      | <0.00001   |
| <b>2010</b> | Kela         | 60 | 1      | 0.8415      | <0.00001   |
| <b>2010</b> | Selenkenyi   | 59 | 0.926  | 0.8269      | <0.00001   |
| <b>2011</b> | Tissana      | 70 | 0.8258 | 0.659       | <0.00001   |
| <b>2011</b> | Sidarebougou | 22 | 0.8333 | 0.463       | <0.00001   |
| <b>2011</b> | Selinkenyei  | 38 | 1      | 0.7133      | <0.00001   |
| <b>2012</b> | Selenkenyi   | 69 | 0.9222 | 0.6487      | <0.00001   |

128

129 **Table S3:** Estimated selection coefficient and initial resistant allele frequency for L1014F in *A. coluzzii*  
 130 and *A. gambiae* in Selenkenyi/Kela and Sidarebougou.  $p_0$  = initial allele frequency,  $h$  = dominance  
 131 coefficient,  $s$  = selection coefficient,  $N$  = number of timepoints sampled,  $R^2$  = correlation coefficient,  
 132 RMSE = reduced mean square error. Parameters were estimated using  $h = 0, 0.25, 0.5, 0.75$ , and the best  
 133 fit ( $h = 0.5$ ) was reported.

| site                   | population         | $p_0$    | $h$ | $s$     | $N$ | $R^2$    | RMSE    | reduced<br>chi-squared |
|------------------------|--------------------|----------|-----|---------|-----|----------|---------|------------------------|
| <b>Selenkenyi/Kela</b> | <i>A. coluzzii</i> | 1.70E-06 | 0.5 | 0.13159 | 8   | 0.95570  | 0.06396 | 4.09E-03               |
| <b>Selenkenyi/Kela</b> | <i>A. gambiae</i>  | 8.81E-03 | 0.5 | 0.06478 | 6   | 0.76304  | 0.13122 | 1.72E-02               |
| <b>Sidarebougou</b>    | <i>A. coluzzii</i> | 1.12E-06 | 0.5 | 0.14355 | 5   | 0.99997  | 0.00166 | 2.79E-06               |
| <b>Sidarebougou</b>    | <i>A. gambiae</i>  | 8.00E-01 | 0.5 | 0.01430 | 5   | -0.06539 | 0.06343 | 4.02E-03               |

134

135

136 **Figure S1:** Map of field site locations in Mali, including annual precipitation categories. **A)** *A. coluzzii*  
137 and *A. gambiae* populations in 2006, **B)** populations in 2009-2012. Due to geographic proximity,  
138 Selenkenyi and Kela are shown together. Pie graphs indicate *A. gambiae* in shades of blue, *A. coluzzii* in  
139 yellow/orange/red. Darker segments on pie charts indicate proportion resistant homozygotes (r/r),  
140 medium shades indicate heterozygotes (+/r), and light colors indicate susceptible homozygotes (+/+).

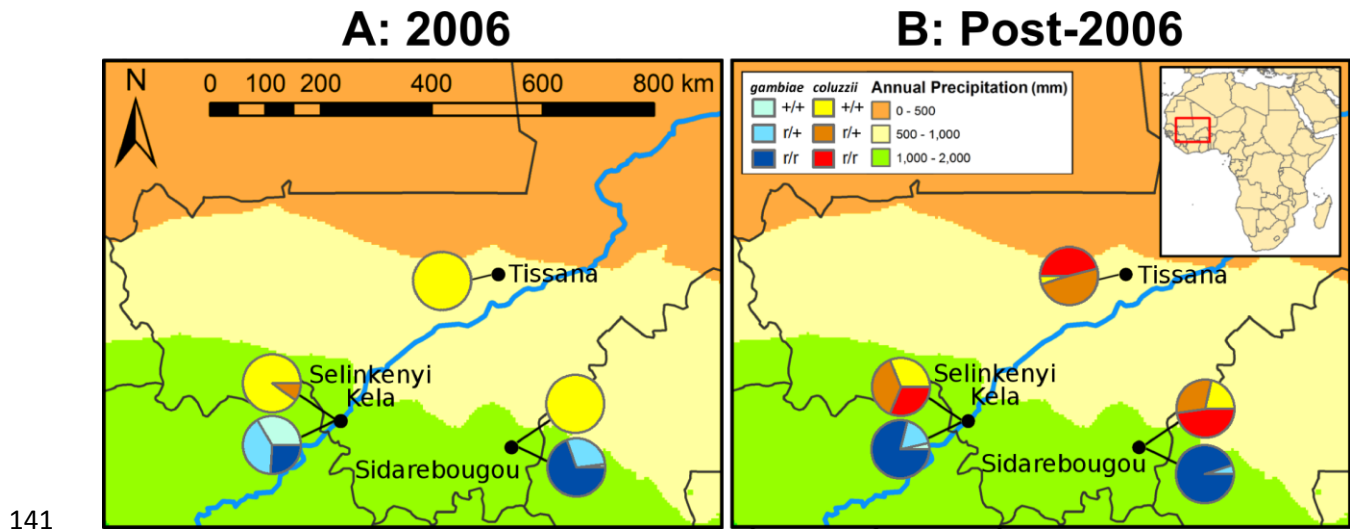

141

142



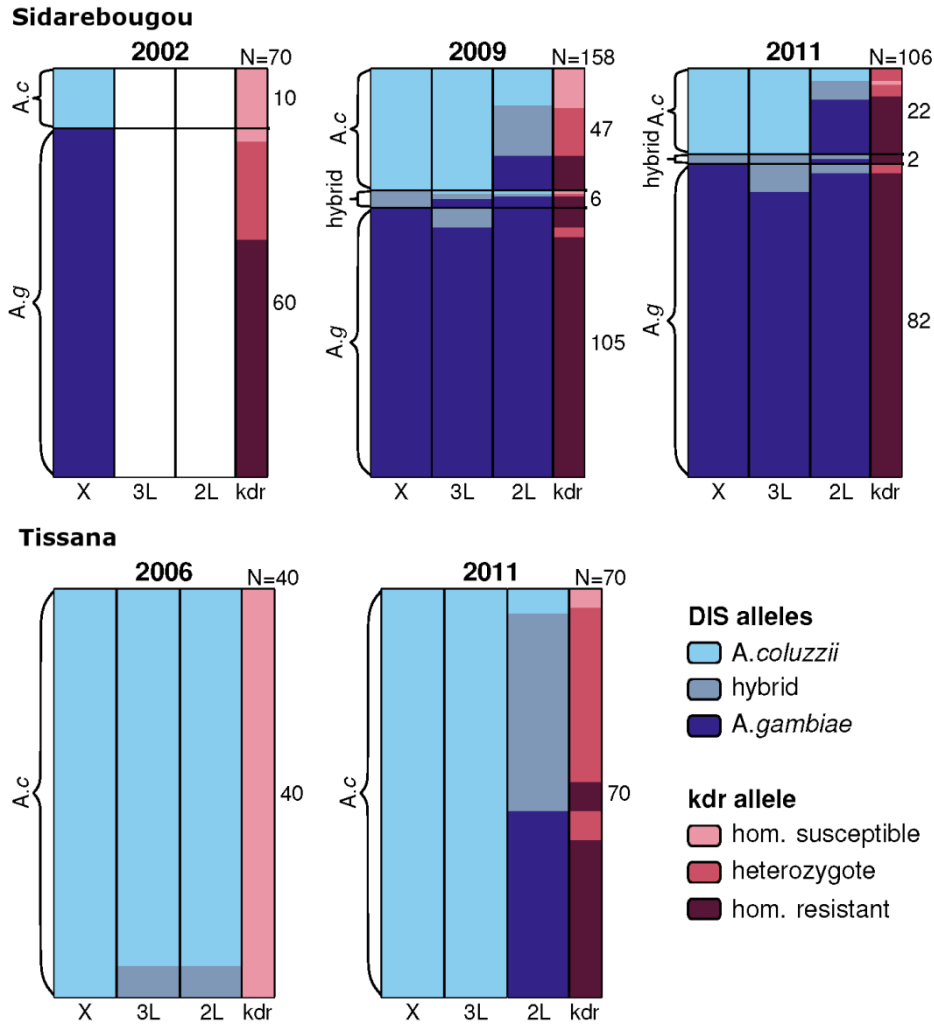

143

144 **Figure S2:** Heat maps of three divergence island SNPs and the L1014F SNP for Sidarebougou and  
 145 Tissana pre- and post-introgression. Columns represent SNPs (X divergence island, 3L island, 2L island,  
 146 L1014F/*kdr-w*), individual mosquitoes are represented by colored horizontal lines, with individuals  
 147 stacked vertically. Light blue = homozygous for *A. coluzzii*-associated alleles, dark blue = homozygous  
 148 for *A. gambiae*-associated alleles, grey = heterozygous, white = missing data, dark red = r/r, medium red  
 149 = +/-r and pink = +/+. Samples that are heterozygous (grey) across the X, 2L, and 3L SNPs are assumed  
 150 to be F<sub>1</sub> hybrids. Population assignments (*A. coluzzii*, hybrid, and *A. gambiae*) are indicated by brackets  
 151 on the left of each heat map.

152

153 **Figure S3.** Proportion *A. gambiae* ancestry (Gaussian-smoothing with 100kb windows and a degree of 5)  
154 for *A. gambiae* (purple), pre-introgression *A. coluzzii* (blue), introgressed *A. coluzzii* (red). Line width  
155 indicates standard error among samples. Dark Gray lines indicate centromeres. Light gray area indicates  
156 the chromosome boundaries.

157

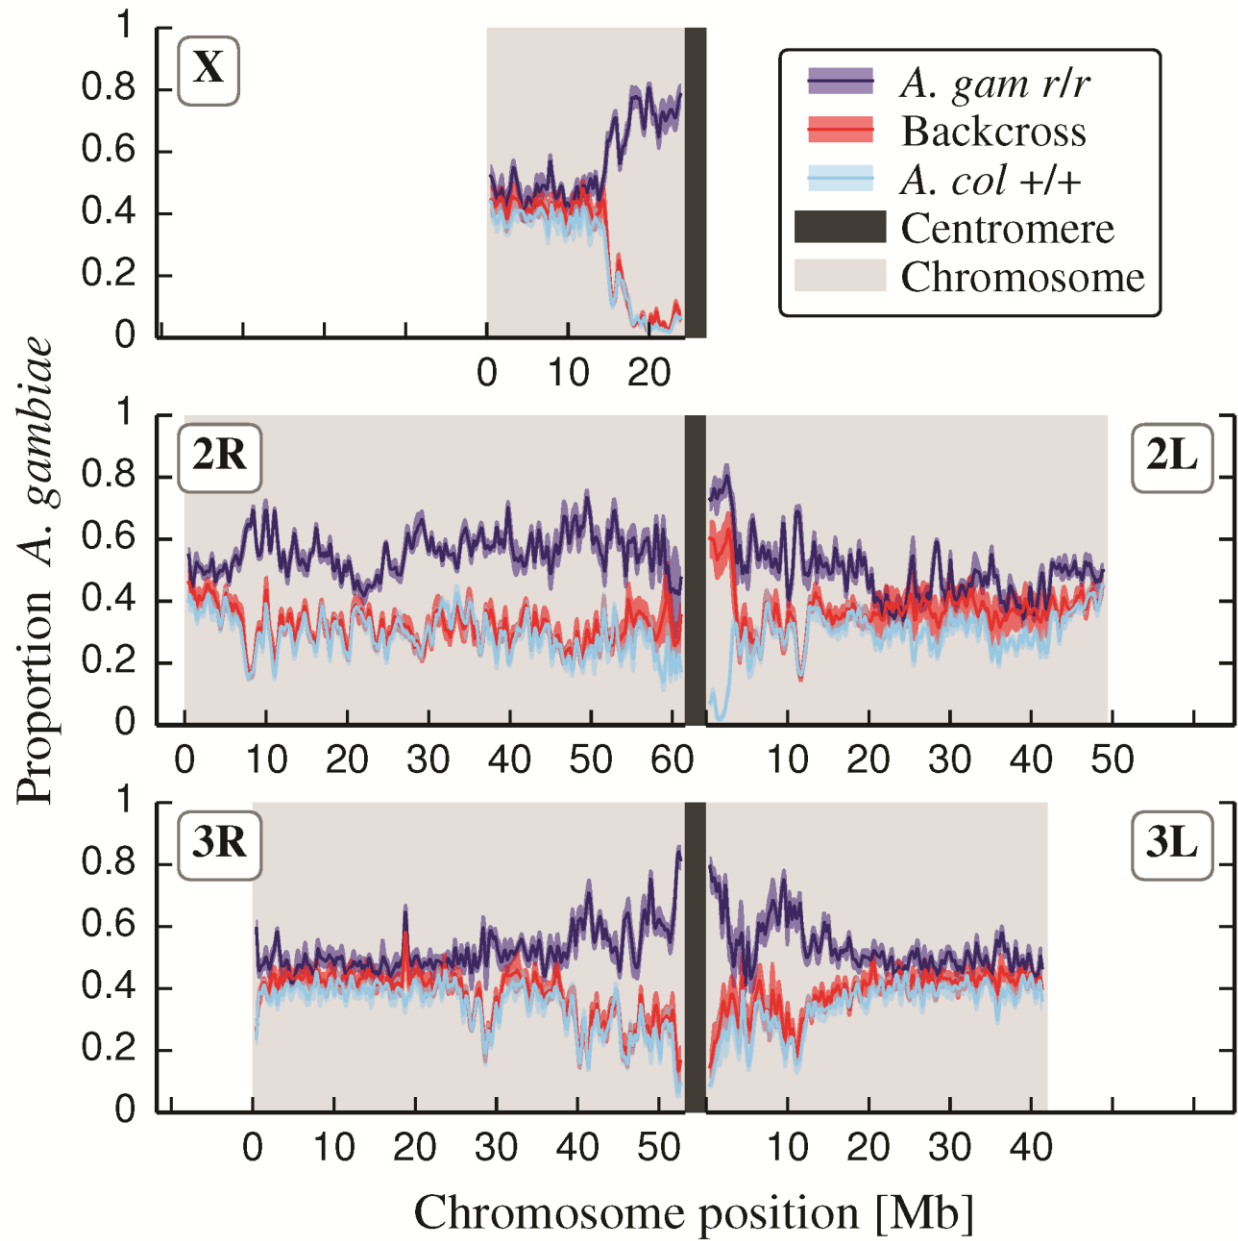

158

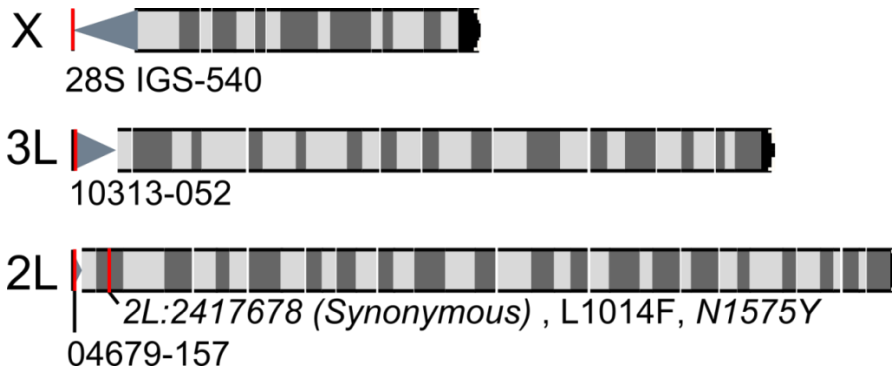

159

160 **Figure S4.** Genomic location of SNPs used in the manuscript. A synonymous SNP at the 2,417,678 bp of

161 the 2L chromosomal arm and a non-synonymous mutation, N1575Y are within the *kdr* gene and

162 genotypes were retrieved from genome sequence data. Other SNP genotypes were determined using

163 iPLEX Gold Assay.

164

165 **SUPPLEMENTAL REFERENCES**

- 166 1. Reimer L, *et al.* (2008) Relationship between kdr mutation and resistance to pyrethroid and DDT  
167 insecticides in natural populations of *Anopheles gambiae*. *J Med Entomol* 45(2):260-266.
- 168 2. Scott JA, Brogdon WG, & Collins FH (1993) Identification of single specimens of the *Anopheles*  
169 *gambiae* complex by the polymerase chain reaction. *Am J Trop Med Hyg* 49(4):520-529.
- 170 3. Favia G, *et al.* (1997) Molecular identification of sympatric chromosomal forms of *Anopheles*  
171 *gambiae* and further evidence of their reproductive isolation. *Insect Mol Biol* 6(4):377-383.
- 172 4. Favia G, Lanfrancotti A, Spanos L, Siden-Kiamos I, & Louis C (2001) Molecular characterization of  
173 ribosomal DNA polymorphisms discriminating among chromosomal forms of *Anopheles gambiae* s.s.  
174 *Insect Mol Biol* 10(1):19-23.
- 175 5. White BJ, Cheng C, Simard F, Constantini C, & Besansky NJ (2010) Genetic association of  
176 physically unlinked islands of genomic divergence in incipient species of *Anopheles gambiae*.  
177 *Molecular ecology* 19:925-939.
- 178 6. Martinez-Torres D, *et al.* (1998) Molecular characterization of pyrethroid knockdown resistance (kdr)  
179 in the major malaria vector *Anopheles gambiae* s.s. *Insect Mol Biol* 7(2):179-184.
- 180 7. Excoffier L, Laval G, & Schneider S (2005) Arlequin (version 3.0): An integrated software package  
181 for population genetics data analysis. *Evolutionary Bioinformatics Online* 1:47-50.
- 182 8. Huang Q, Shete S, Swartz M, & Amos CI (2005) Examining the effect of linkage disequilibrium on  
183 multipoint linkage analysis. *BMC genetics* 6 Suppl 1:S83.
- 184 9. Hunter JD (2007) Matplotlib: A 2D graphics environment. *Computing in Science & Engineering* 9(3).
- 185 10. Lee Y, *et al.* (2013) Spatiotemporal dynamics of gene flow and hybrid fitness between the M and S  
186 forms of the malaria mosquito, *Anopheles gambiae*. *Proc Natl Acad Sci U S A* 110(49):19854-19859.
- 187 11. Barbosa S, Black WCt, & Hastings I (2011) Challenges in estimating insecticide selection pressures  
188 from mosquito field data. *PLoS neglected tropical diseases* 5(11):e1387.
- 189 12. Lohse M, *et al.* (2012) RobiNA: a user-friendly, integrated software solution for RNA-Seq-based  
190 transcriptomics. *Nucleic Acids Res* 40(Web Server issue):W622-627.

- 191 13. Lunter G & Goodson M (2011) Stampy: a statistical algorithm for sensitive and fast mapping of  
192 Illumina sequence reads. *Genome research* 21(6):936-939.
- 193 14. Li H & Durbin R (2009) Fast and accurate short read alignment with Burrows-Wheeler transform.  
194 *Bioinformatics* 25(14):1754-1760.
- 195 15. Anonymous (Picard Tools.
- 196 16. McKenna A, *et al.* (2010) The Genome Analysis Toolkit: a MapReduce framework for analyzing  
197 next-generation DNA sequencing data. *Genome Res* 20(9):1297-1303.
- 198 17. Li H, *et al.* (2009) The Sequence Alignment/Map format and SAMtools. *Bioinformatics* 25(16):2078-  
199 2079.
- 200 18. Badolo A, *et al.* (2012) Three years of insecticide resistance monitoring in *Anopheles gambiae* in  
201 Burkina Faso: resistance on the rise? *Malar J* 11:232.
- 202 19. Danecek P, *et al.* (2011) The variant call format and VCFtools. *Bioinformatics* 27(15):2156-2158.
